# Supplementary material
Source: publisher figshare collection journal article supplement (https://frontiersin.figshare.com/ndownloader/files/10543996)
Supplement: Supplementary file [file 10543996]

## *Supplementary Material*

### **Title: The expression and prognostic impact of immune cytolytic activity-related markers in human malignancies: A comprehensive meta-analysis**

Constantinos Roufas <sup>1,2</sup>, Dimitrios Chasiotis <sup>1</sup>, Anestis Makris <sup>1</sup>, Christodoulos Efstathiades <sup>2</sup>, Christos Dimopoulos <sup>2</sup>, Apostolos Zaravinos <sup>1,\*</sup>

<sup>1</sup> Department of Life Sciences, Biomedical Sciences Program, School of Sciences, European University Cyprus, Nicosia, Cyprus.

<sup>2</sup> The Center for Risk and Decision Sciences (CERIDES), Department of Computer Sciences, School of Sciences, European University Cyprus, Nicosia, Cyprus.

**\* Correspondence: Apostolos Zaravinos, PhD. Biomedical Sciences Program, Department of Life Sciences, School of Sciences, European University Cyprus. 6, Diogenes Str. Engomi, P.O. Box 22006, 1516, Nicosia, Cyprus. Tel: +357-22559577. Email: [a.zaravinos@euc.ac.cy](mailto:a.zaravinos@euc.ac.cy)**

## Supplementary Figures

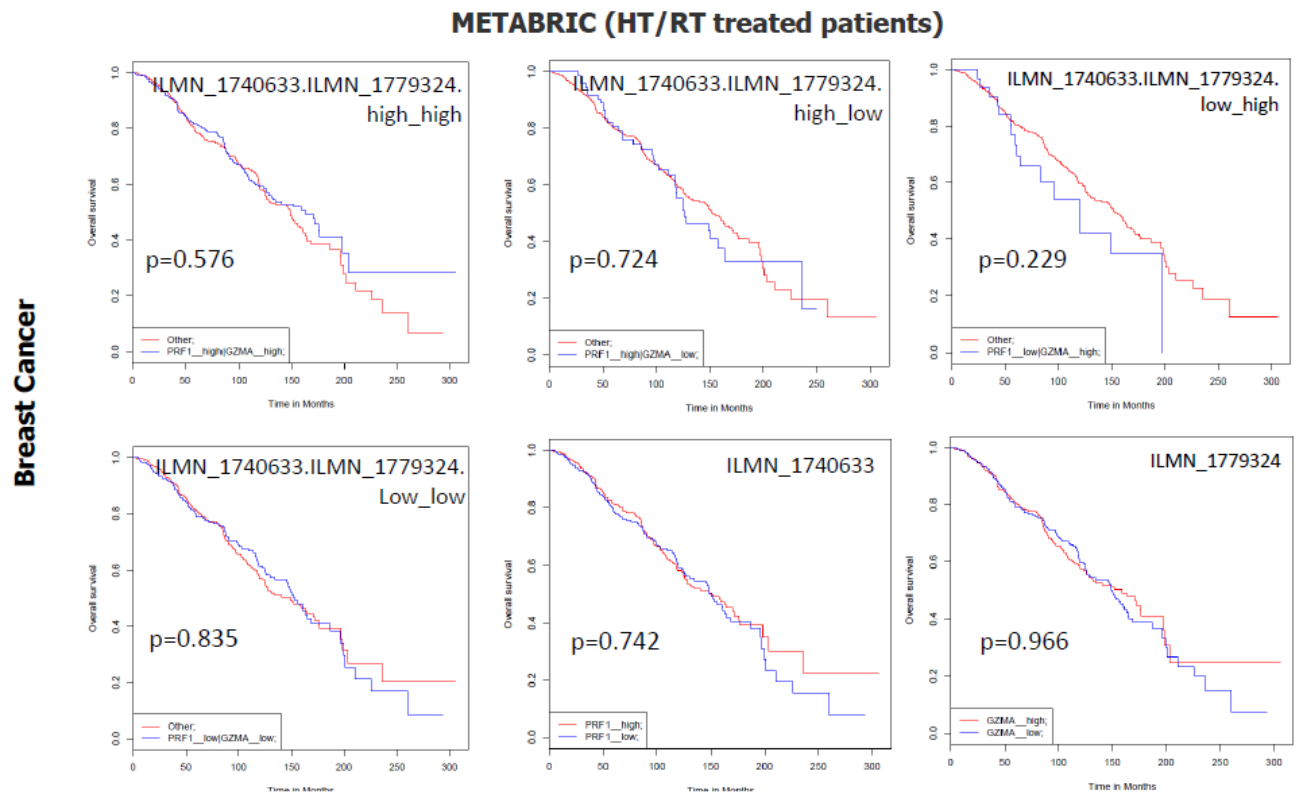

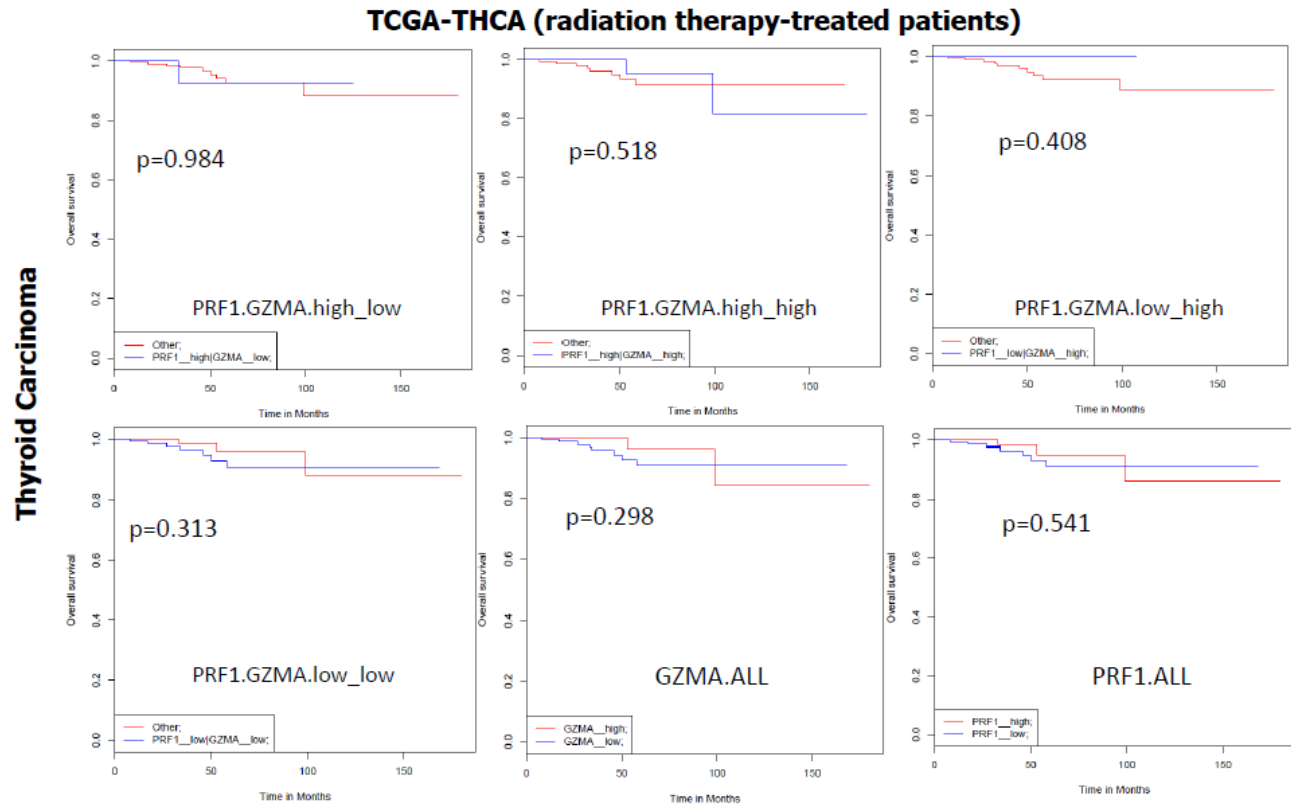

**Figure S6.** In the METABRIC dataset, breast cancer patients who were treated with hormonal therapy plus radiotherapy (HT/RT) (n=605) were separated from the untreated patients. Similarly, in the THCA dataset, thyroid carcinoma patients who were treated with radiotherapy (n=305) were separated from the untreated patients. The Kaplan-Meier curves were plotted using various combinations of distinct molecular probes for PRF1 and GZMA (PRF1, 1553681\_A\_AT, 214617\_AT or ILMN\_1740633; GZMA, 205488\_AT or ILMN\_1779324); however, without providing any significant association with patient survival.
